# Supplementary material for: Zinc ion detection using a benzothiazole-based highly selective fluorescence “turn-on” chemosensor and its real-time application
Source: Royal Society of Chemistry journal article supplement (doi:10.1039/d2ra04874d), 2022-01-01
Supplement: d2ra04874d1.pdf [file d2ra04874d1.pdf]

## Zinc ion detection using a benzothiazole-based highly selective fluorescence “turn-on” chemosensor and its real-time application

Saravanan Enbanathan<sup>a</sup>, Sathishkumar Munusamy<sup>b</sup>, Dhanapal Jothi<sup>a</sup>, Selin Manojkumar<sup>a</sup>,  
Saravanakumar Manickam<sup>c</sup> and Sathiyarayanan Kulathu Iyer<sup>a\*</sup>

<sup>a</sup>Department of Chemistry, School of Advanced Sciences and Vellore Institute of Technology, Vellore-632014, India. \*E-mail: [sathiya\\_kuna@hotmail.com](mailto:sathiya_kuna@hotmail.com)

<sup>b</sup>Department of Chemistry, Faculty of Science, Chulalongkorn University, Phayathai Rd., Pathumwan, Bangkok, 10330, Thailand. E-mail: [pra3sat@gmail.com](mailto:pra3sat@gmail.com)

<sup>c</sup>Department of Chemistry, Saveetha School of Engineering, Saveetha Institute of Medical and Technical Sciences (SIMATS), Chennai-602 105, Tamil Nadu and India.

**SI Figure S1.** <sup>1</sup>H NMR spectra of **BTP**.

**SI Figure S2.** <sup>13</sup>C NMR spectra of **BTP**.

**SI Figure S3.** <sup>1</sup>H NMR spectra of **BTH**.

**SI Figure S4.** <sup>13</sup>C NMR spectra of **BTH**.

**SI Figure S5.** <sup>1</sup>H NMR spectra of **BIPP**

**SI Figure S6.** <sup>13</sup>C NMR spectra of **BIPP**.

**SI Figure S7.** HRMS spectra of **BIPP**.

**SI Figure S8.** Absorption spectra of **BIPP** presence and absence of Zn<sup>2+</sup>.

**SI Figure S9.** LOD of **BIPP** with Zn<sup>2+</sup> at 473nm.

**SI Figure S10.** Time response of **BIPP** in the presence of Zn<sup>2+</sup>.

**SI Figure S11.** HRMS spectra of **BIPP**+ Zn<sup>2+</sup>.

**SI Figure S12.** Job's plot exemplifies the 1:1 complex of **BIPP** with Zn<sup>2+</sup>.

**SI Figure S13.** The binding constant of **BIPP** with Zn<sup>2+</sup>.

**SI Figure S14.** FT-IR spectra variations of **BIPP** upon the addition of Zn<sup>2+</sup>ion.

SI Figure S15. Cytotoxicity assay of **BIPP**.

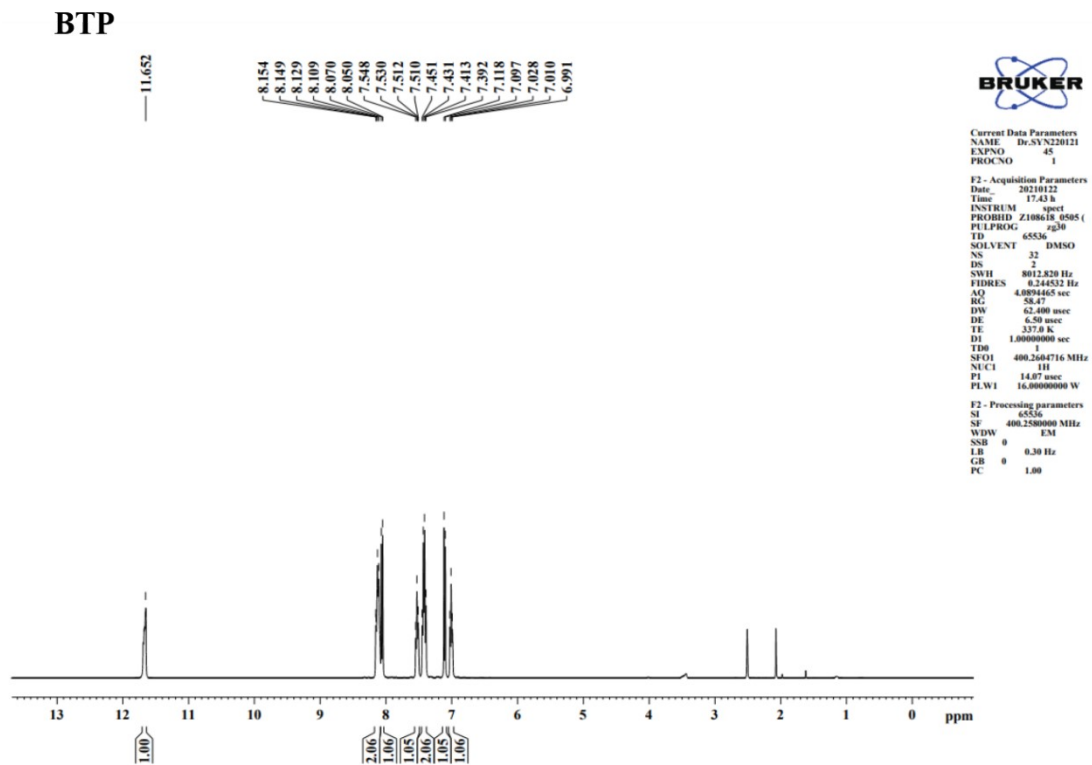

SI Figure S1 <sup>1</sup>H NMR spectra of **BTP**.

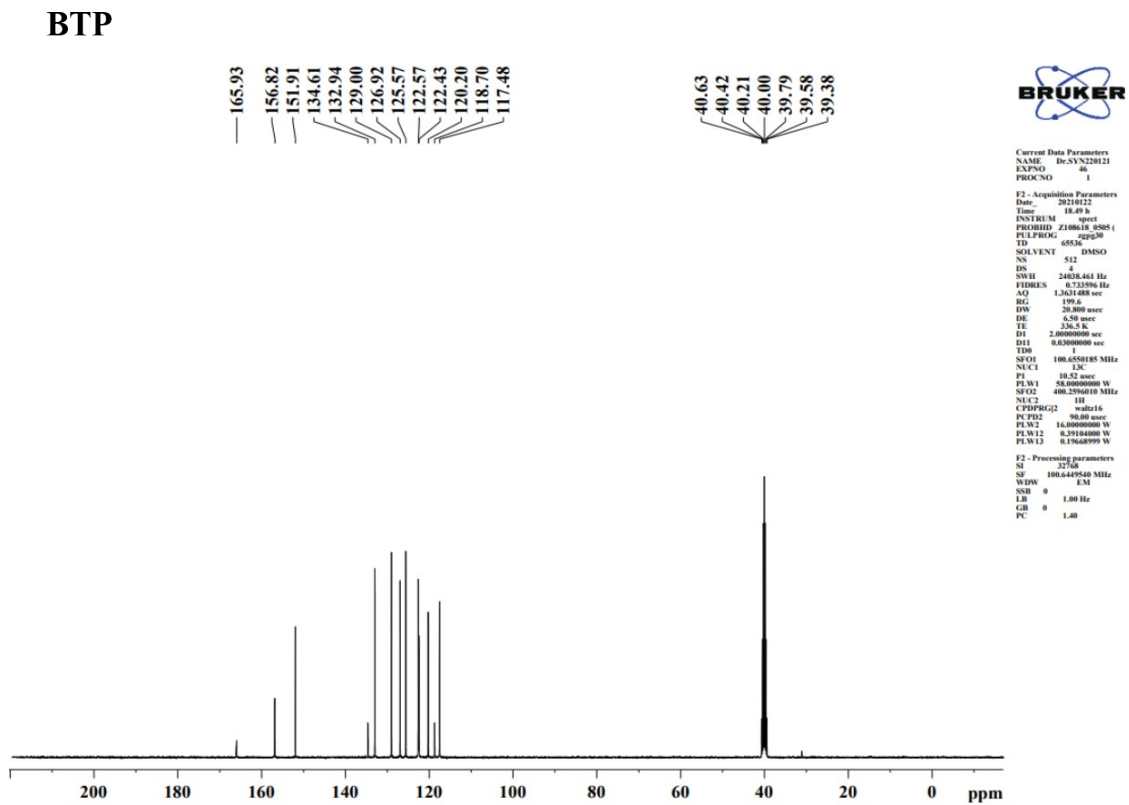

SI Figure S2. <sup>13</sup>C NMR spectra of **BTP**.

# BTH

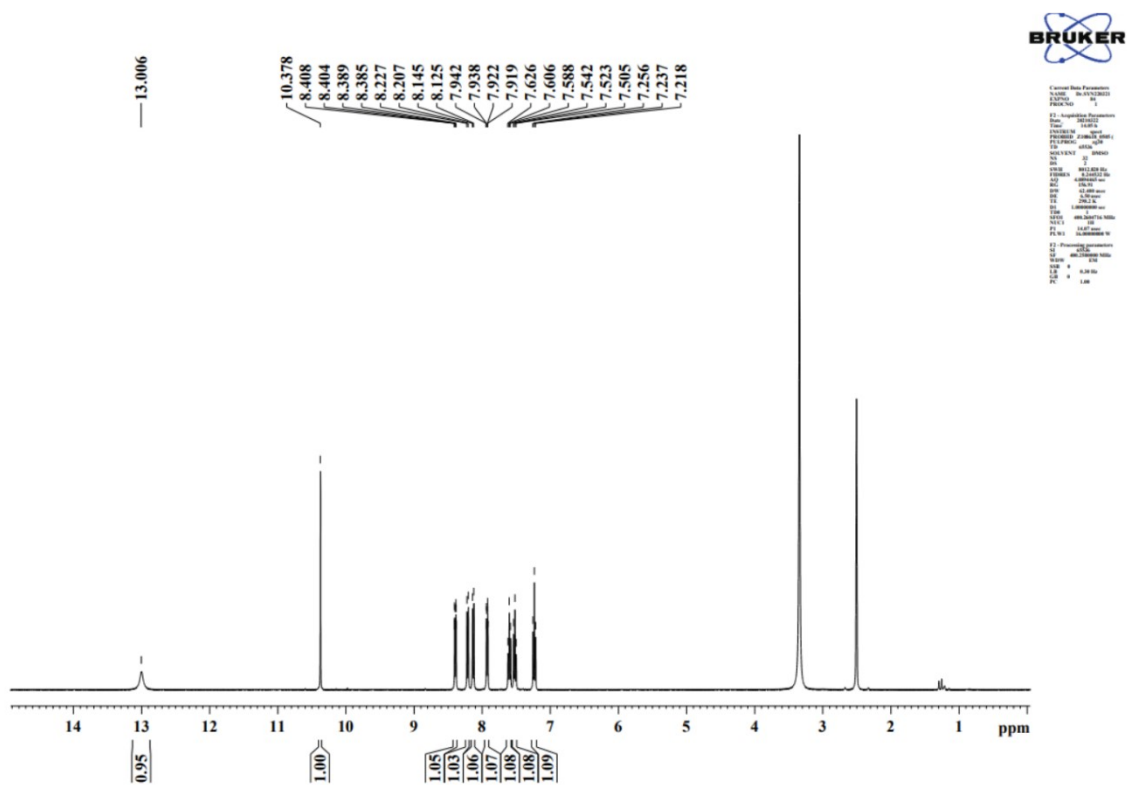

SI Figure S3. <sup>1</sup>H NMR spectra of BTH.

# BTH

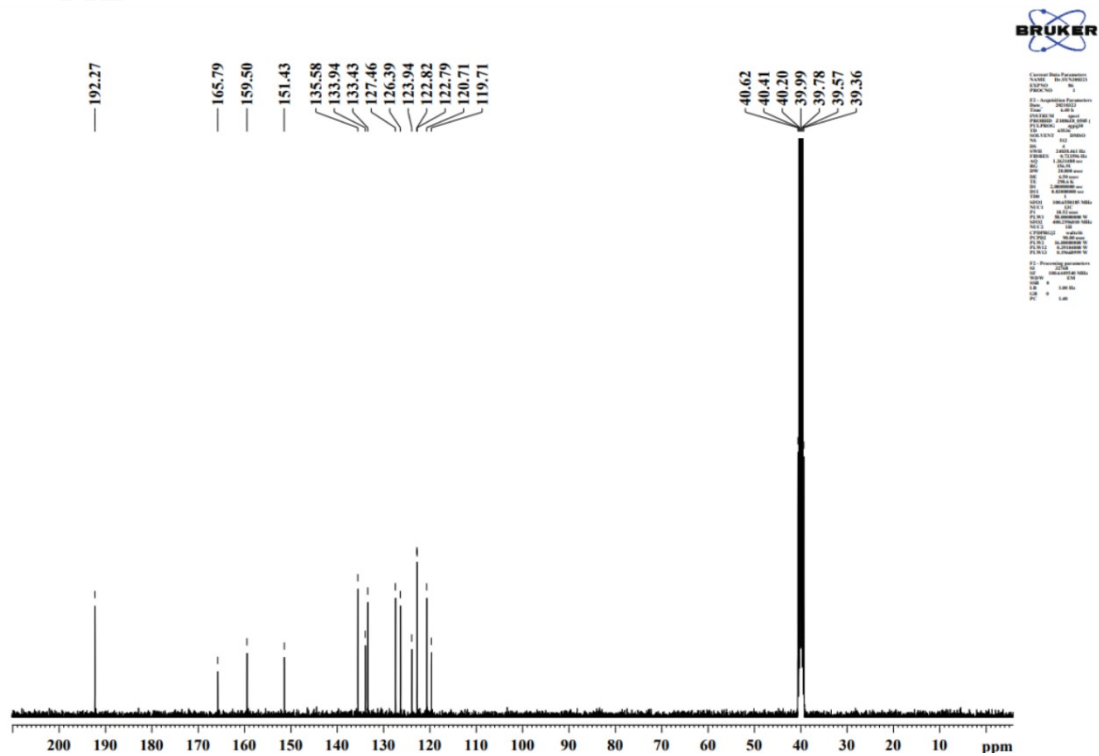

SI Figure S4. <sup>13</sup>C NMR spectra of BTH.

**BIPP**

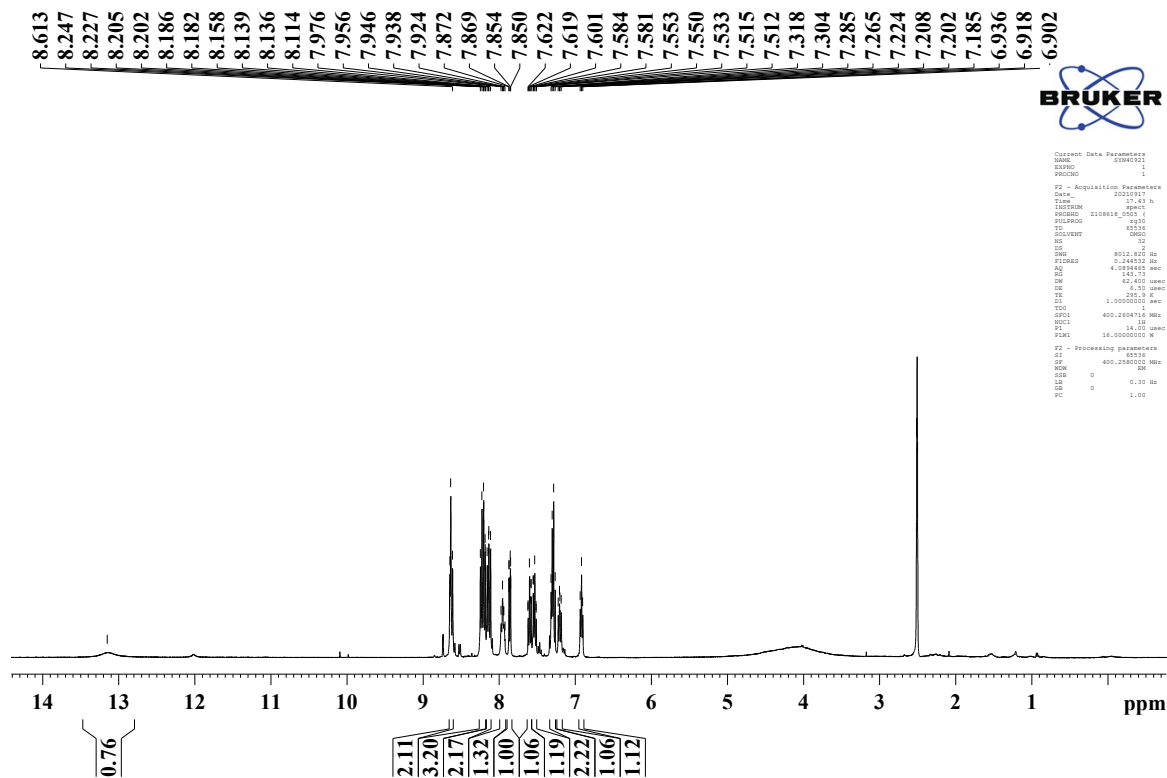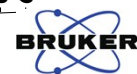

```

Current Data Parameters
NAME: 2194021
EXPNO: 1
PROCNO: 1
F2 - Acquisition Parameters
Date_: 20230111
Time: 07:43
INSTRUM: spect
PROBHD: znmzhs-5mm1
PULPROG: zgpg30
TD: 65536
SOLVENT: DMSO
NS: 32
DS: 4
SWH: 802.872 Hz
F2: 400.264370 MHz
AQ: 0.244370 sec
RG: 327.500
AQ2: 4.092460 sec
DE: 0.100000 sec
TE: 300.2 K
DE2: 6.10 usec
T2: 295.21 M
D1: 1.0000000 sec
D11: 0.1000000 sec
SFO: 400.264370 MHz
SF1: 400.264370 MHz
SF81: 16.0000000 M
F2 - Processing parameters
SI: 32768
SF: 400.264370 MHz
WDW: EM
SSB: 0
LB: 0.30 Hz
GB: 0
PC: 1.00
    
```

SI Figure S5. <sup>1</sup>H NMR spectra of BIPP.

**BIPP**

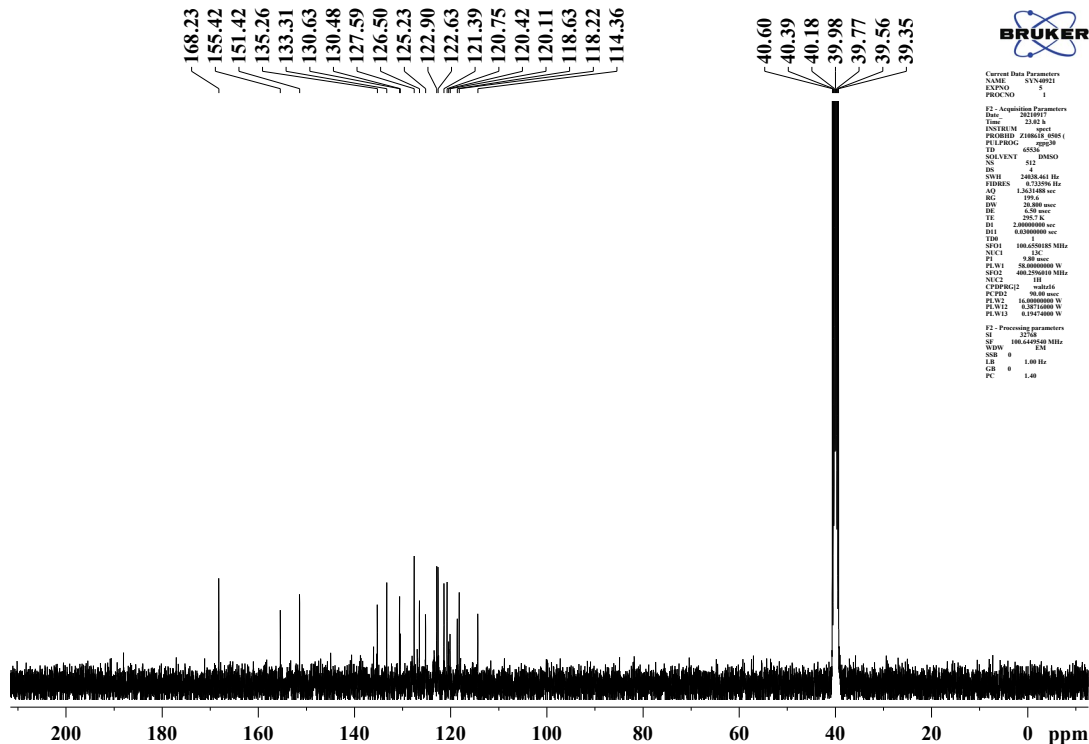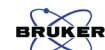

```

Current Data Parameters
NAME: 2194021
EXPNO: 1
PROCNO: 1
F2 - Acquisition Parameters
Date_: 20230111
Time: 22:42
INSTRUM: spect
PROBHD: znmzhs-5mm1
PULPROG: zgpg30
TD: 65536
SOLVENT: DMSO
NS: 32
DS: 4
SWH: 24838.461 Hz
F2: 125.761 MHz
AQ: 1.363488 sec
RG: 1024
DE: 20.000 usec
TE: 300.2 K
DE2: 2.0000000 sec
D1: 0.2000000 sec
SFO: 100.626185 MHz
SFO1: 100.626185 MHz
N1C1: 13C
F1: 125.761 MHz
SFO2: 400.259489 MHz
N1C2: 1H
CPDPRG2: zgpg30
PCPD2: 10.000000 sec
PLW2: 16.000000 W
PLW1: 0.300000 W
PLW3: 0.100000 W
F2 - Processing parameters
SI: 32768
SF: 100.626185 MHz
WDW: EM
SSB: 0
LB: 0.30 Hz
GB: 0
PC: 1.00
    
```

SI Figure S6. <sup>13</sup>C NMR spectra of BIPP.

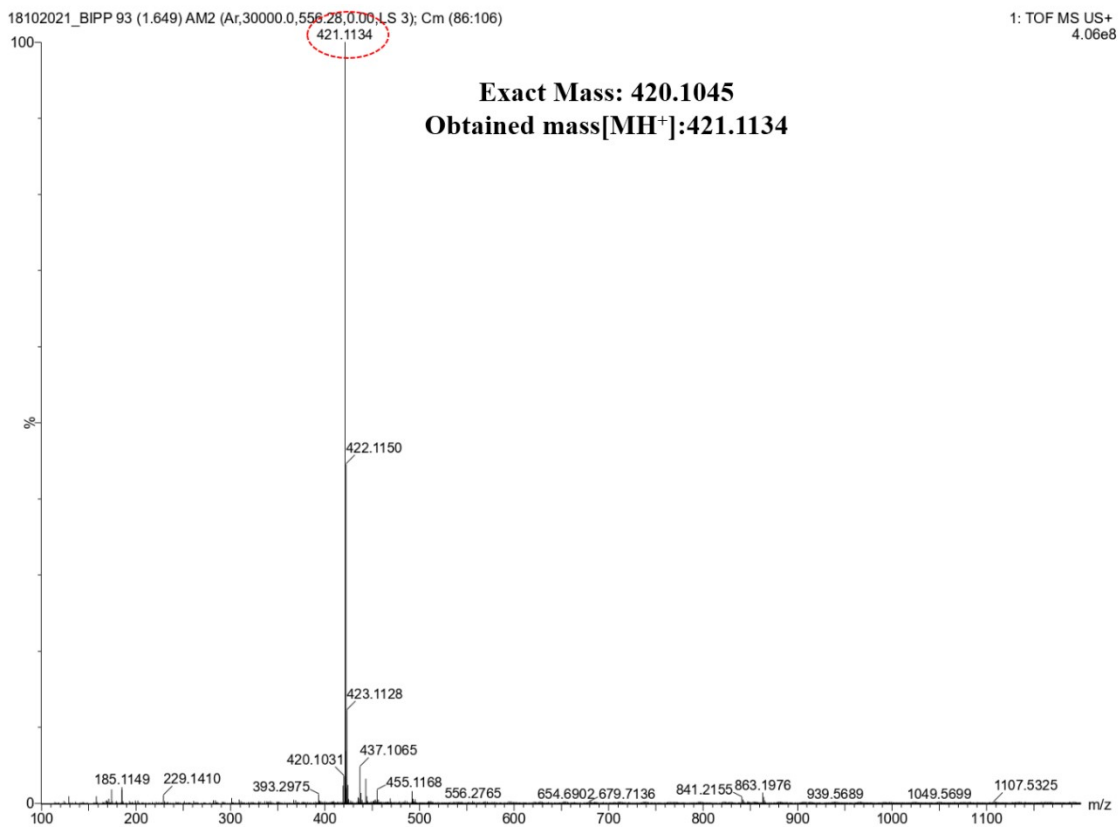

SI Figure S7. HRMS spectra of BIPP.

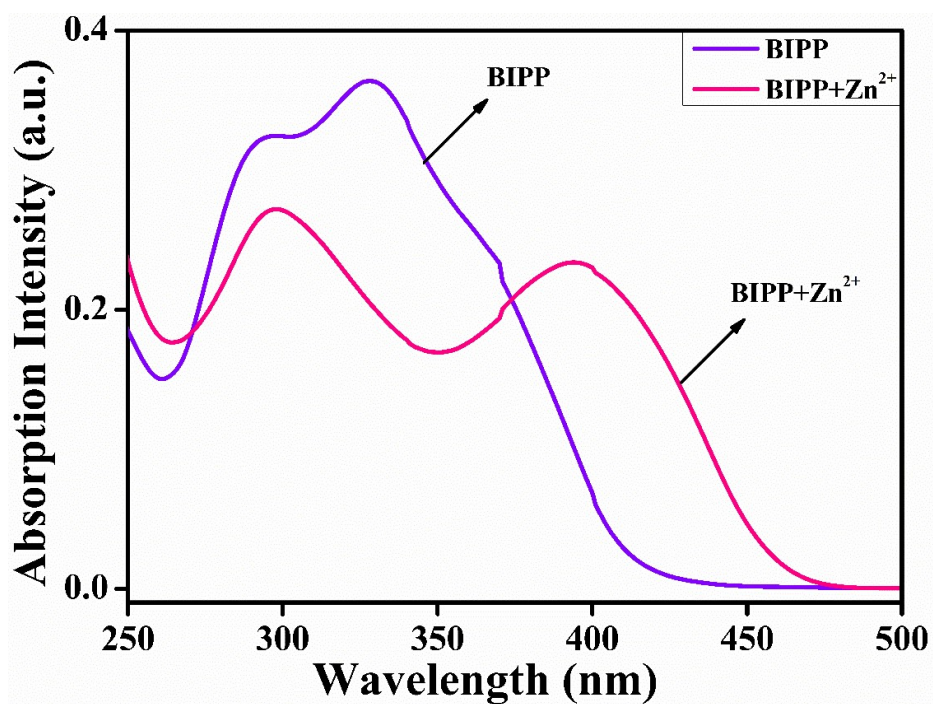

SI Figure S8. Absorption spectra of BIPP presence and absence of Zn<sup>2+</sup>.

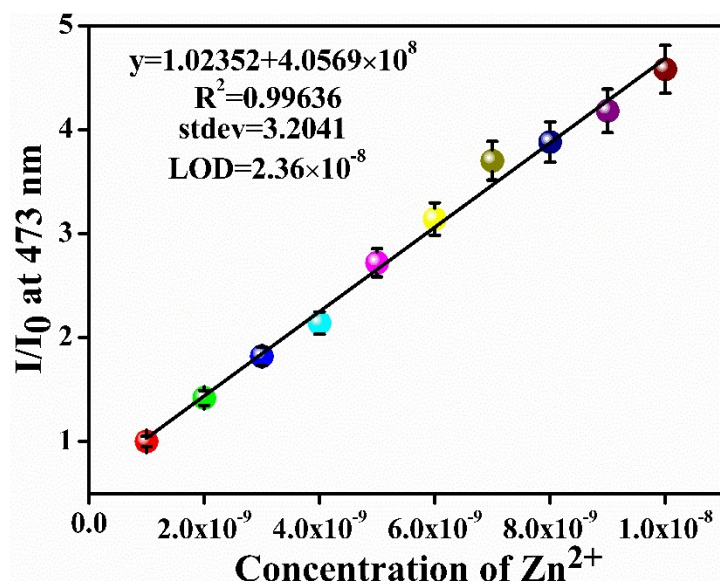

SI Figure S9. LOD of BIPP with  $\text{Zn}^{2+}$  at 473nm.

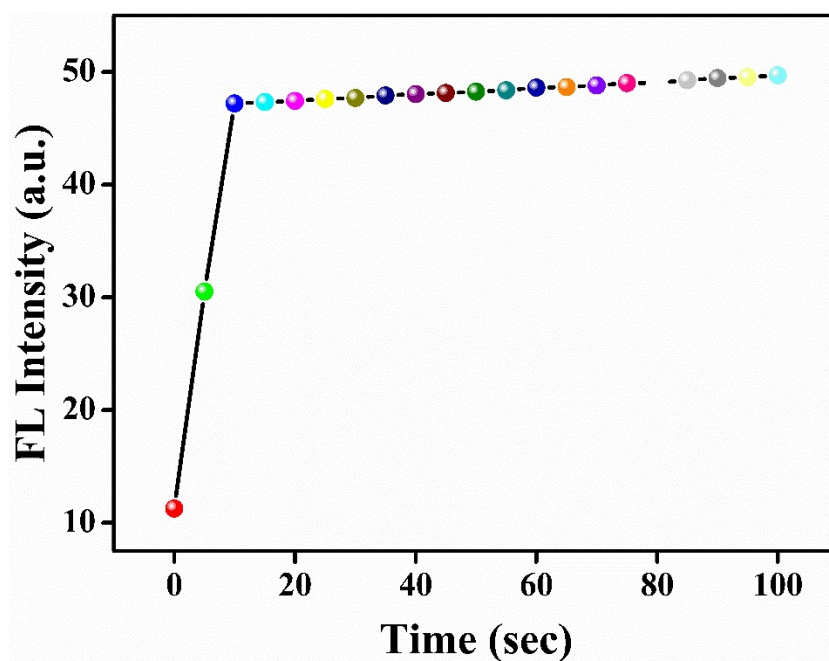

SI Figure S10. Time response of BIPP in the presence of  $\text{Zn}^{2+}$ .

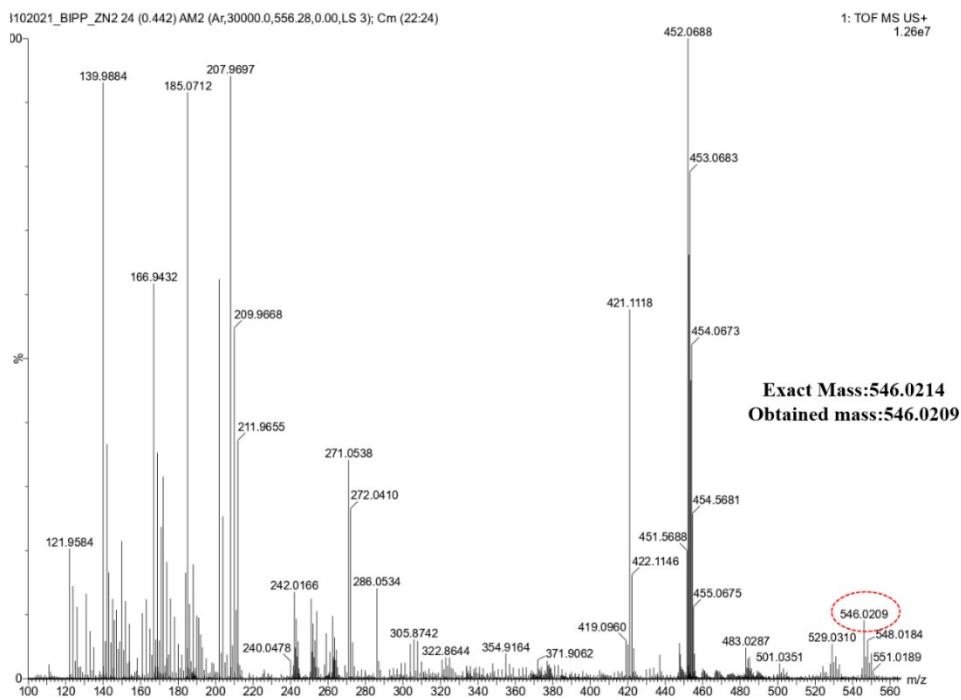

SI Figure S11. HRMS spectra of **BIPP**+  $\text{Zn}^{2+}$ .

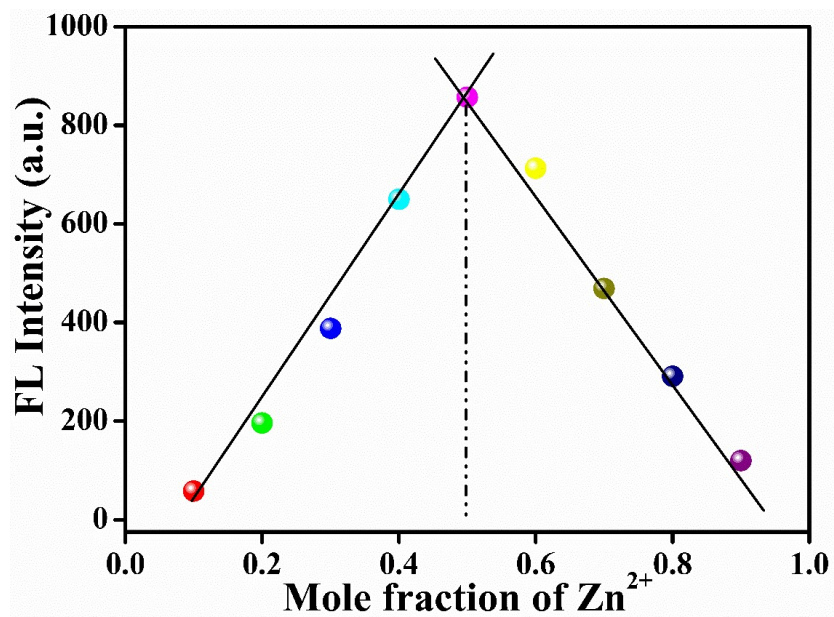

SI Figure S12. Job's plot exemplifies the 1:1 complex of **BIPP** with  $\text{Zn}^{2+}$ .

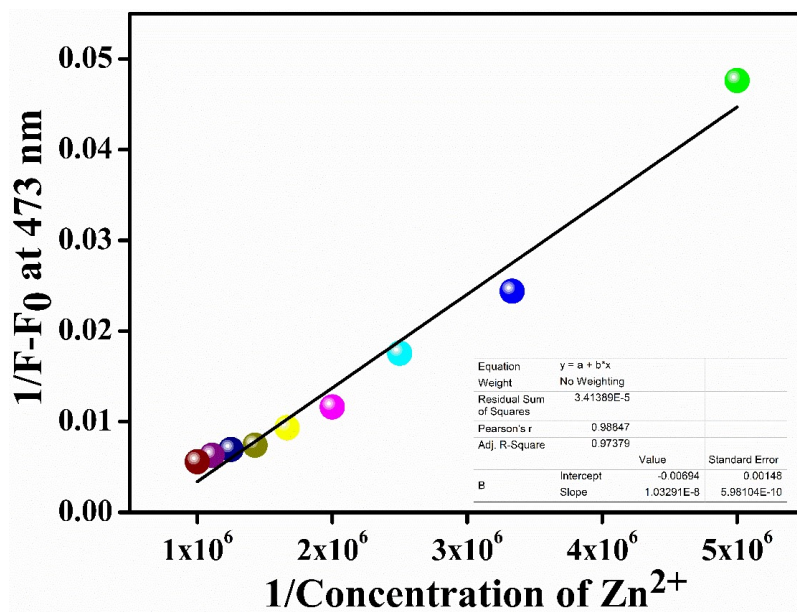

SI Figure S13. The binding constant of **BIPP** with  $Zn^{2+}$ .

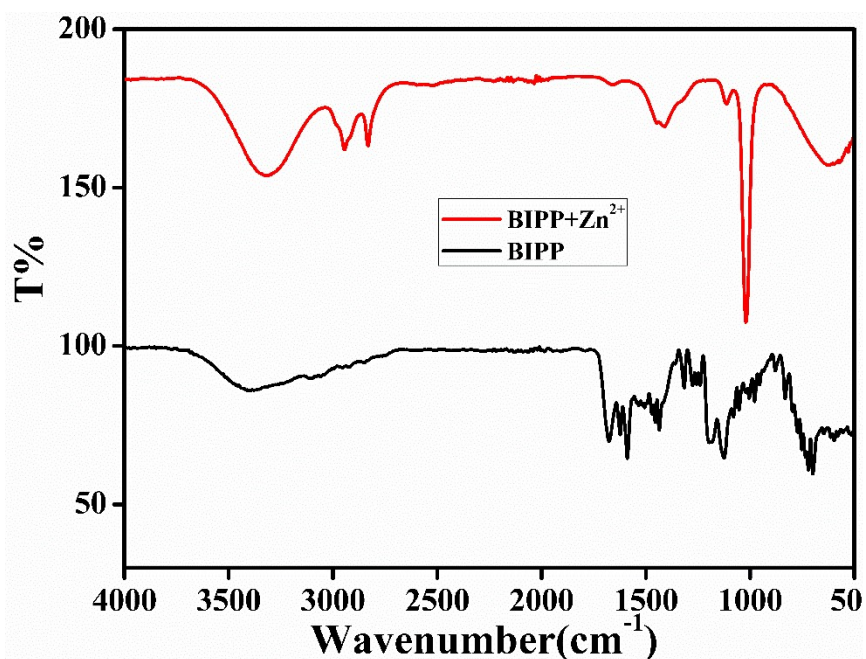

SI Figure S14. FT-IR spectra variations of **BIPP** upon the addition of  $Zn^{2+}$  ion.



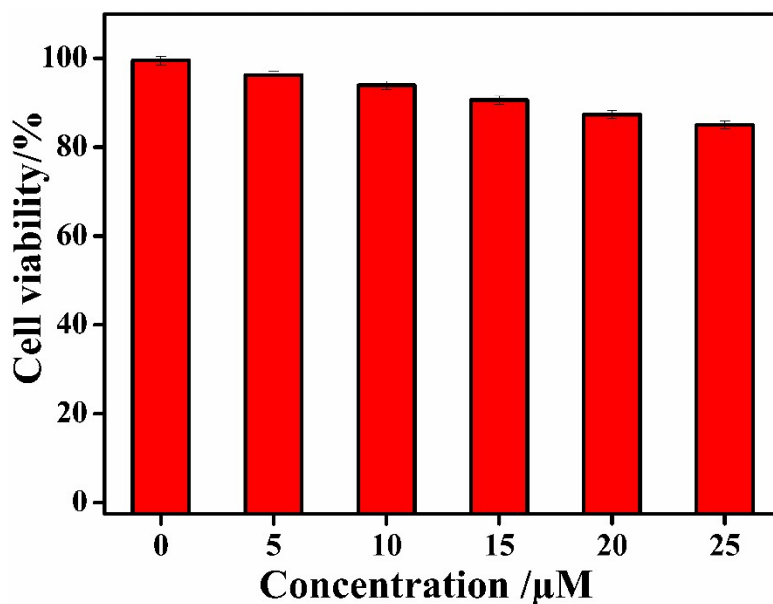

**SI Figure S15.** Cytotoxicity assay of **BIPP**.

**SI Table S1** the comparison table of probe **BIPP** in earlier and current studies for detection of  $\text{Zn}^{2+}$  ion.

| S. N O | PROBES                                                     | MEDIUM                                                                   | SENSING TYPE | Bin ding mode | LOD                 | APPLIC ATION | REFERENCE                                  |
|--------|------------------------------------------------------------|--------------------------------------------------------------------------|--------------|---------------|---------------------|--------------|--------------------------------------------|
| 1      | dipyromethene based                                        |                                                                          | OFF-ON       | 1:1           | 0.236 $\mu\text{M}$ | Cell images  | Sensors and Actuators B 203 (2014) 719–725 |
| 2      | 1-(2-hydroxynaphthylmethylene)-2-(2-hydroxybenzylidene)    | DMF/H <sub>2</sub> O (9:1 to 1:9, v/v, containing 10 mM PBS at pH 7.4)   | OFF-ON       | 1:1           | 46 nM               | -            | doi.org/10.1016/j.jlumin.2017.10.064       |
| 3      | 2-((3-morpholinopropyl)amino)-N-((quinolin-8-yl)acetamide) | acetonitrile-water solution(v/v <sup>1/4</sup> 7: 3, 10mM Hepes, pH 7.0) | OFF-ON       | 1:1           | 0.29 $\mu\text{M}$  | Cell images  | <i>New J. Chem.</i> , 2020, 44, 442        |
| 4      | benzoxazole                                                | DMSO: H <sub>2</sub> O (1:9 v/v, 50 mM)                                  | OFF-ON       | 1:1           | 0.52 $\mu\text{M}$  | Cell images  | 10.1016/j.jphotochem.2018.10.036           |

|    |                                             |                                                                  |             |     |                         |                          |                                                                                             |
|----|---------------------------------------------|------------------------------------------------------------------|-------------|-----|-------------------------|--------------------------|---------------------------------------------------------------------------------------------|
|    |                                             | HEPES buffer)                                                    |             |     |                         |                          |                                                                                             |
| 5  | quinoline-based                             | MeOH:HEPES=3:7, v/v, pH 7.4                                      | OFF-ON      | 1:1 | $2.1 \times 10^{-8}$ M  | Cell imaging             | 10.1016/j.snb.2016.04.175                                                                   |
| 6  | Benzoxazole based                           | EtOH : HEPES $\frac{1}{4}$ : 1 (pH $\frac{1}{4}$ 7.2)            | OFF-ON      | 1:1 |                         | Cell imaging             | J. Mater. Chem. B, 2014, 2, 2008–2012                                                       |
| 7  | 8-aminoquinoline                            | acetonitrile-Tris-HCl (50 mM, pH 7.40) (9 : 1, v/v)              | OFF-ON      | 1:1 | 1.96 $\mu$ M            | Cell images              | Dalton Trans., 2014, 43, 1881                                                               |
| 8  | Tris(3-(2-hydroxyacetophenone)propyl)amine  | Tris-HCl buffer                                                  | OFF-ON      | 1:1 | $8.8 \times 10^{-8}$ M  |                          | 10.1016/j.snb.2014.03.06                                                                    |
| 9  | 1,2,3-triazole moieties via a diaminopropyl | EtOH                                                             | OFF-ON      | 1:2 | 1 $\mu$ M               | Cell images              | 10.1016/j.snb.2016.01.045                                                                   |
| 10 | acylhydrazone group                         | H <sub>2</sub> O/DMSO, 8:2, v/v                                  | OFF-ON      | 1:1 | $9.3 \times 10^{-8}$ M  | Cell images              | Sensors and Actuators B 208 (2015) 581–587                                                  |
| 11 | 8-hydroxyquinoline                          | DMSO/H <sub>2</sub> O (4:1, v/v) in HEPES buffer (20 mM, pH 7.4) | OFF-ON      | 1:3 | 9.87 $\mu$ M            | logic gates, Cell images | Sensors and Actuators B 200 (2014) 123–131                                                  |
| 12 | 8-aminoquinoline-based                      | Tris-HCl (50 mM, pH 7.4)                                         | ratiometric | 2:1 | $8.85 \times 10^{-8}$ M | Cell images              | Bioorganic & Medicinal Chemistry Letters Volume 23, Issue 12, 15 June 2013, Pages 3511-3514 |
| 13 | quinoline-based                             | MeOH-Tris buffer (7/3, v/v, pH 7.3)                              | OFF-ON      | 1:1 | $3.8 \times 10^{-8}$ M  | Cell images              | Tetrahedron Volume 75, Issue 49, 6 December 2019, 130710                                    |
| 14 | quinoline-based                             | CH <sub>3</sub> CN/H <sub>2</sub> O, 2/98, v/v                   | ratiometric | 1:1 | 0.063 $\mu$ M           | Cell images              | Dyes and Pigments Volume 102, March 2014, Pages 301-307                                     |

|    |                                                  |                                        |               |            |                               |                                         |                                                                                       |
|----|--------------------------------------------------|----------------------------------------|---------------|------------|-------------------------------|-----------------------------------------|---------------------------------------------------------------------------------------|
| 15 | PoPAP based                                      | Ethanol.                               | OFF-ON        | 2:1        |                               |                                         | Dyes and Pigments 193 (2021) 109567                                                   |
| 16 | naphthalimide based                              | Ethanol                                | OFF-ON        | 1:1        | 0.18 μM                       |                                         | Journal of Molecular Structure 1261 (2022) 132901                                     |
| 17 | 1,2,3-triazolyl function and 2,2-dipicolylamine  | HEPES buffer, pH = 7.4.                | OFF-ON        | 1:1        | 107 nM                        |                                         | Journal of the Taiwan Institute of Chemical Engineers 139 (2022) 104507               |
| 18 | o-chlorobenzoic acid and p-phenylenediamine.     |                                        | OFF-ON        |            | 0.09 μM                       | cell image                              | Spectrochimica Acta Part A: Molecular and Biomolecular Spectroscopy 261 (2021) 120028 |
| 19 | 4-hydroxycoumarin                                | CH <sub>3</sub> CN/H <sub>2</sub> O    | OFF-ON        | 1:1        | 3.58 × 10 <sup>-8</sup> M.    | cell image                              | Spectrochimica Acta Part A: Molecular and Biomolecular Spectroscopy 207 (2019) 16–22  |
| 20 | 2-((2-morpholinoethylimino)methyl)-4-bromophenol | water: methanol (9:1, v/v) (pH = 7.4)  | OFF-ON        | 1:1        | 4.41 × 10 <sup>-7</sup> M.    | cell image                              | Inorganica Chimica Acta 519 (2021) 120258                                             |
| 21 | dansyl chloride with a pseudo salen moiety       | Ethanol.                               | OFF-ON        | 1:1        | 83 nM                         | cell image                              | Talanta 125 (2014) 301–305                                                            |
| 22 | 1,8-naphthalimide derivative                     | (CH <sub>3</sub> CN/HEPES, V/V = 6:4). | OFF-ON        |            | 0.21 μM                       | cell image                              | Tetrahedron Letters 54 (2013) 3353–3358                                               |
|    | <b>Benzothiazole and imidazole</b>               | <b>ACN/H<sub>2</sub>O (8:2, v/v)</b>   | <b>OFF-ON</b> | <b>1:1</b> | <b>2.36 × 10<sup>-8</sup></b> | <b>Real sample analysis, cell image</b> | <b>Current paper</b>                                                                  |
